# Supplementary material
Source: bioRxiv or medRxiv preprint supplement (https://www.biorxiv.org/highwire/filestream/75909/field_highwire_adjunct_files/2/241760-3.pdf)

# Karasov, Figure S3

**a**

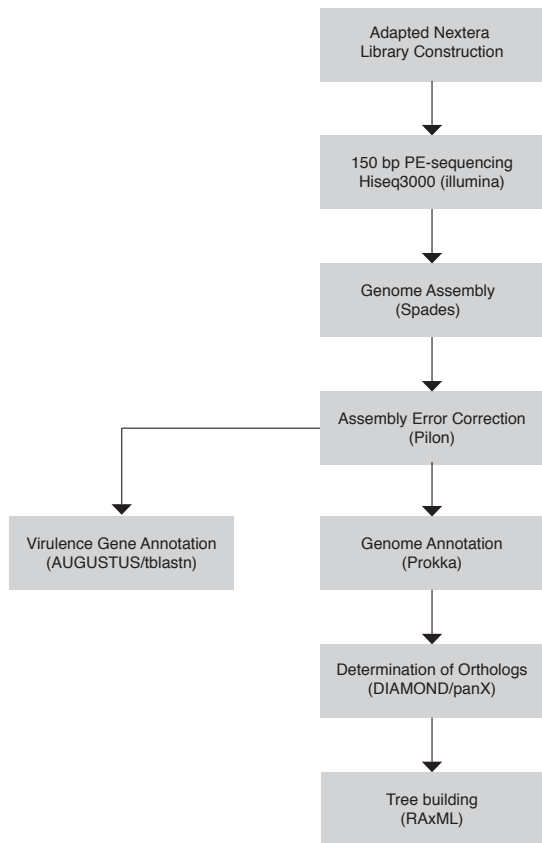

**b**

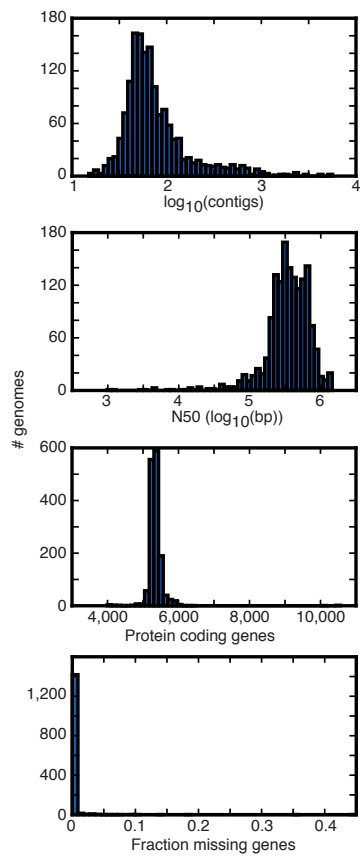

Supplement: Supplementary file [file 241760-3.pdf]
